# Supplementary material for: Association of APOL1 Genotypes With Measures of Microvascular and Endothelial Function, and Blood Pressure in MESA
Source: PubMed Central journal article supplement — J Am Heart Assoc. 2020 Aug 27;9(17):e017039. doi: 10.1161/JAHA.120.017039 (PMC7660790; doi:10.1161/jaha.120.017039), 2020-08-27

# **SUPPLEMENTAL MATERIAL**

**Table S1. Number of anti-hypertensive medications by MESA Exam visit and *APOL1* risk status.**

| <b>Number of anti-hypertensive medications</b> | <b>All</b>  | <b><i>APOL1</i> high-risk</b> | <b><i>APOL1</i> low-risk</b> |
|------------------------------------------------|-------------|-------------------------------|------------------------------|
| <b>Exam 1</b>                                  |             |                               |                              |
| Mean (SD)                                      | 0.82 (1.01) | 0.95 (1.09)                   | 0.80 (0.99)                  |
| 0                                              | 817 (50%)   | 86 (45%)                      | 731 (51%)                    |
| 1                                              | 421 (26%)   | 53 (28%)                      | 368 (26%)                    |
| 2                                              | 262 (16%)   | 31 (16%)                      | 231 (16%)                    |
| ≥3                                             | 119 (7%)    | 20 (11%)                      | 99 (7%)                      |
| <b>Exam 2</b>                                  |             |                               |                              |
| Mean (SD)                                      | 0.91 (1.08) | 1.03 (1.15)                   | 0.90 (1.07)                  |
| 0                                              | 743 (47%)   | 78 (42%)                      | 665 (48%)                    |
| 1                                              | 415 (26%)   | 52 (28%)                      | 363 (26%)                    |
| 2                                              | 267 (17%)   | 34 (18%)                      | 233 (17%)                    |
| ≥3                                             | 147 (9%)    | 20 (11%)                      | 127 (9%)                     |
| <b>Exam 3</b>                                  |             |                               |                              |
| Mean (SD)                                      | 1.05 (1.10) | 1.30 (1.19)                   | 1.02 (1.09)                  |
| 0                                              | 583 (40%)   | 57 (34%)                      | 526 (41%)                    |
| 1                                              | 428 (29%)   | 40 (24%)                      | 388 (30%)                    |
| 2                                              | 291 (20%)   | 46 (27%)                      | 245 (19%)                    |
| ≥3                                             | 161 (11%)   | 27 (16%)                      | 134 (10%)                    |
| <b>Exam 4</b>                                  |             |                               |                              |
| Mean (SD)                                      | 1.08 (1.14) | 1.16 (1.13)                   | 1.06 (1.15)                  |
| 0                                              | 586 (40%)   | 61 (36%)                      | 525 (41%)                    |
| 1                                              | 418 (29%)   | 47 (28%)                      | 371 (29%)                    |
| 2                                              | 279 (19%)   | 41 (24%)                      | 238 (18%)                    |
| ≥3                                             | 178 (12%)   | 21 (12%)                      | 157 (12%)                    |
| <b>Exam 5</b>                                  |             |                               |                              |
| Mean (SD)                                      | 1.24 (1.15) | 1.36 (1.16)                   | 1.22 (1.15)                  |
| 0                                              | 374 (32%)   | 43 (30%)                      | 331 (33%)                    |
| 1                                              | 362 (31%)   | 39 (27%)                      | 323 (32%)                    |
| 2                                              | 252 (22%)   | 36 (25%)                      | 216 (21%)                    |
| ≥3                                             | 172 (15%)   | 27 (19%)                      | 145 (14%)                    |

SD=standard deviation.

Figure S1. Flowchart of study population.

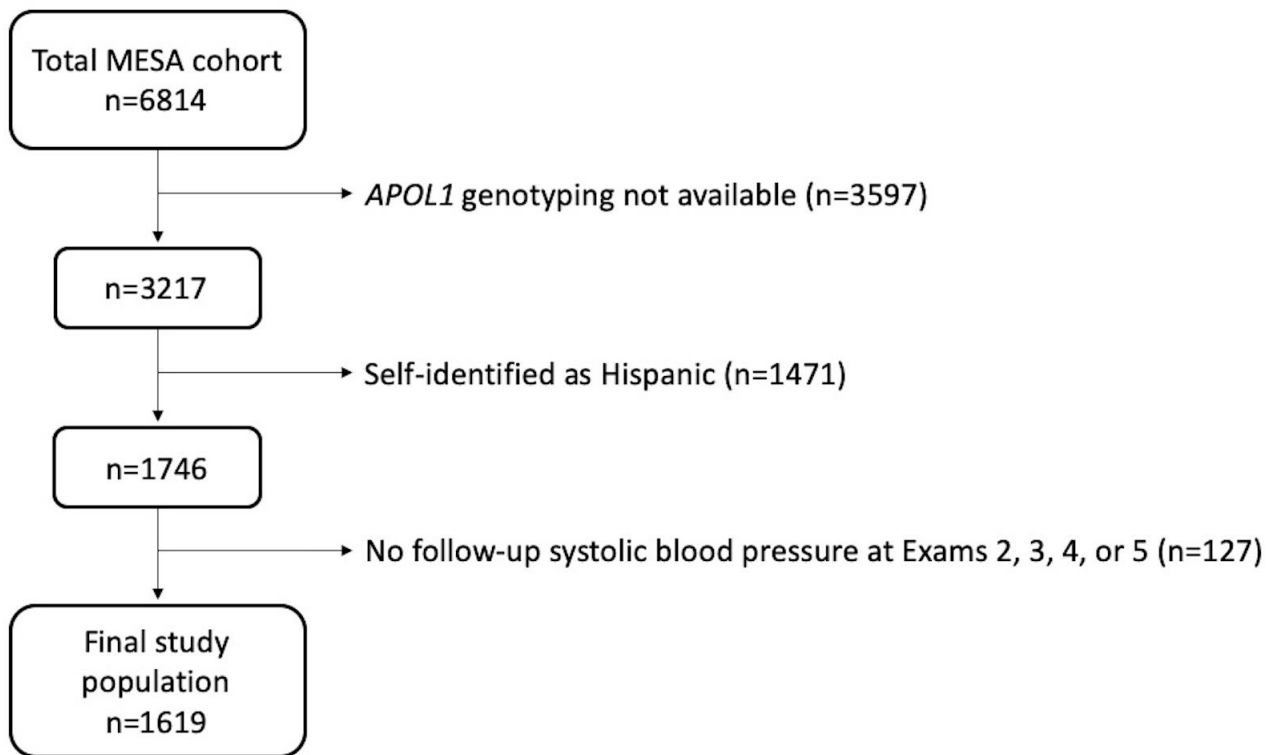

Supplement: JAH3-9-e017039-s001.pdf [file JAH3-9-e017039-s001.pdf]
